# Supplementary material for: Cerebral Oxygenation and Activity During Surgical Repair of Neonates With Congenital Diaphragmatic Hernia: A Center Comparison Analysis
Source: PubMed Central journal article supplement (PMC8718750; doi:10.3389/fped.2021.798952), 2021-12-17

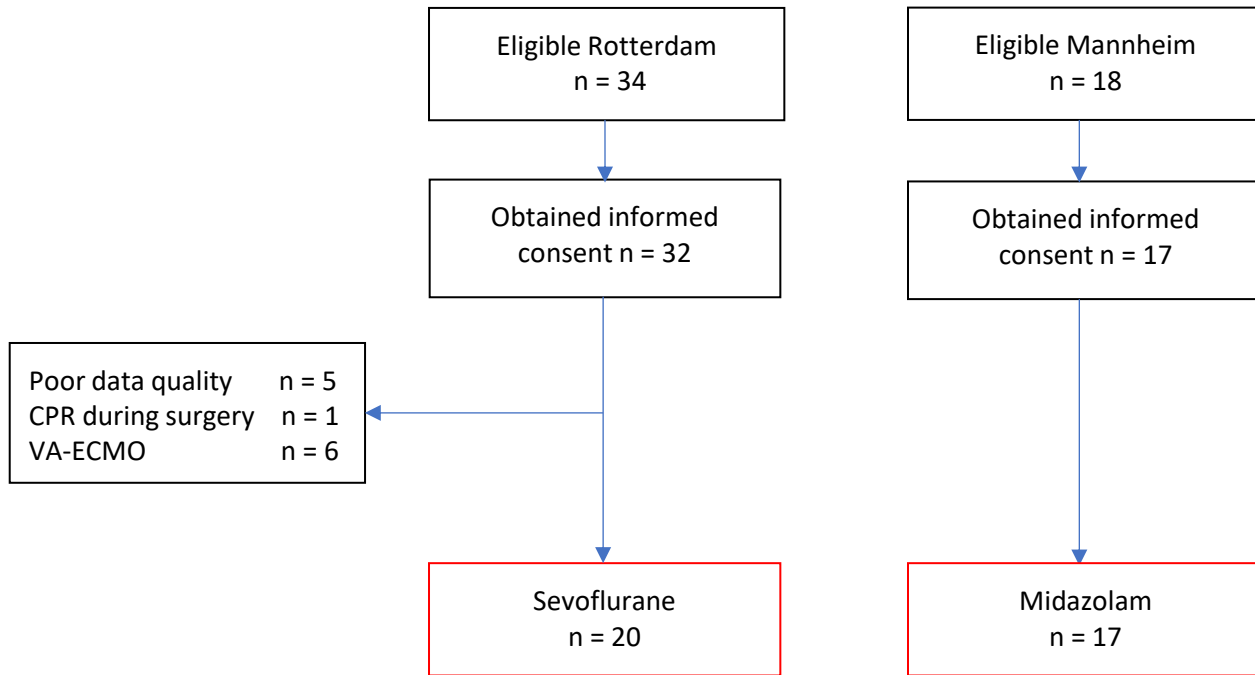

Supplement: Presentation_1.pdf [file Presentation_1.pdf]
